# Supplementary material for: Constitutively active BRS3 is a genuinely orphan GPCR in placental mammals
Source: PLoS Biol. 2019 Mar 6;17(3):e3000175. doi: 10.1371/journal.pbio.3000175 (PMC6422423; doi:10.1371/journal.pbio.3000175)
Supplement: S4 Data — (XLSX) [file pbio.3000175.s025.xlsx]

## Sheet: Panel E
CRE-cs	Blank	hBRS3-WT	cBRS3-WT	cBRS3-Q127R	cBRS3-P205S	cBRS3-R294H	sBRS3-WT	sBRS3-Q127R	sBRS3-P205S	sBRS3-R294H
	1	4.2545	1.2004	0.9857	1.983	1.9036	1.236	1.2105	1.9564	0.8415
	1	3.9246	1.014	0.9378	2.3497	2.1044	1.0892	0.9896	1.871	0.9565
	1	4.0896	1.1072	0.9618	2.1664	2.004	1.1626	1.1001	1.9137	0.899
NFAT-cs	Blank	hBRS3-WT	cBRS3-WT	cBRS3-Q127R	cBRS3-P205S	cBRS3-R294H	sBRS3-WT	sBRS3-Q127R	sBRS3-P205S	sBRS3-R294H
	1	6.5264	1.2549	1.9862	1.9058	2.886	1.2733	2.19	1.3333	1.7321
	1	6.2351	1.1253	1.8205	1.8054	2.7506	1.243	2.0255	1.4599	1.6403
	1	6.4018	1.2111	1.9244	1.8766	2.8393	1.2792	2.1288	1.4176	1.7072
SRF-cs	Blank	hBRS3-WT	cBRS3-WT	cBRS3-Q127R	cBRS3-P205S	cBRS3-R294H	sBRS3-WT	sBRS3-Q127R	sBRS3-P205S	sBRS3-R294H
	1	4.1204	1.1164	2.2257	2.4562	1.8011	1.0538	1.9846	1.0244	1.8635
	1	3.9201	1.2407	2.2956	2.5796	1.9254	1.1895	2.3124	0.9684	1.599
	1	4.0202	1.1785	2.2606	2.5179	1.8633	1.1217	2.1485	0.9964	1.7312
CRE-ma	Blank	tBRS3-WT	mBRS3-WT	mBRS3-R127Q	mBRS3-S205P	mBRS3-H294R	aBRS3-WT	aBRS3-R127Q	aBRS3-S205P	aBRS3-H294R
	1	2.5216	19.4537	8.3237	10.1472	14.6469	8.2579	1.9556	1.7877	8.3332
	1	2.0524	18.5759	8.2577	10.2514	15.1834	6.9879	1.9899	1.8879	7.5197
	1	2.287	19.0148	8.2907	10.1993	14.9151	7.6229	1.9728	1.8378	7.9264
NFAT-ma	Blank	tBRS3-WT	mBRS3-WT	mBRS3-R127Q	mBRS3-S205P	mBRS3-H294R	aBRS3-WT	aBRS3-R127Q	aBRS3-S205P	aBRS3-H294R
	1	1.9553	19.0254	2.1302	5.5427	3.326	10.1019	1.8611	2.0497	7.3444
	1	2.5361	18.2536	2.2822	4.9366	3.6423	8.3584	1.7949	2.2165	6.999
	1	2.2457	18.6395	2.2062	5.2396	3.4841	9.2301	1.828	2.1331	7.1717
SRF-ma	Blank	tBRS3-WT	mBRS3-WT	mBRS3-R127Q	mBRS3-S205P	mBRS3-H294R	aBRS3-WT	aBRS3-R127Q	aBRS3-S205P	aBRS3-H294R
	1	2.0136	20.3125	19.3466	5.6202	12.3872	7.5021	1.2347	2.3562	2.9979
	1	2.1365	21.0453	18.9957	6.8188	13.4785	7.2532	1.4569	2.9454	3.038
	1	2.0751	20.6789	19.1711	6.2195	12.9328	7.3777	1.3458	2.6508	3.0179
