# Supplementary material for: Constitutively active BRS3 is a genuinely orphan GPCR in placental mammals
Source: PLoS Biol. 2019 Mar 6;17(3):e3000175. doi: 10.1371/journal.pbio.3000175 (PMC6422423; doi:10.1371/journal.pbio.3000175)
Supplement: S7 Data — (XLSX) [file pbio.3000175.s028.xlsx]

## Sheet: Panel A
	sequence identity	sequence similarity	RMSD
human	0.53	0.66	5.62
pan	0.52	0.65	5.55
mouse	0.53	0.67	5.57
rattus	0.53	0.66	5.78
canis	0.52	0.66	5.84
felis	0.52	0.67	5.64
Orycteropus	0.52	0.67	7.7
Loxodonta	0.53	0.66	6.12
Monodelphis	0.53	0.67	6.92
Phascolarctos	0.53	0.66	6.5
Ornithorhynchus	0.51	0.66	7.93
Gallus	0.52	0.66	4.65
Corvus	0.53	0.65	4.96
anolis	0.47	0.63	7.62
Chrysemys	0.53	0.67	7.4
xenopus	0.53	0.65	7.28
lepisosteus	0.52	0.65	6.64
